# Supplementary material for: Effects of Coleus amboinicus L. Essential Oil and Ethanolic Extracts on Planktonic Cells and Biofilm Formation of Microsporum canis Isolated from Feline Dermatophytosis
Source: Antibiotics (Basel). 2022 Dec 1;11(12):1734. doi: 10.3390/antibiotics11121734 (PMC9774219; doi:10.3390/antibiotics11121734)
Supplement: Supplementary file 1 [file antibiotics-11-01734-s001.zip › Antibiotics-2026194 27-11-22 Supplementary 1-Mass spectra.pdf]

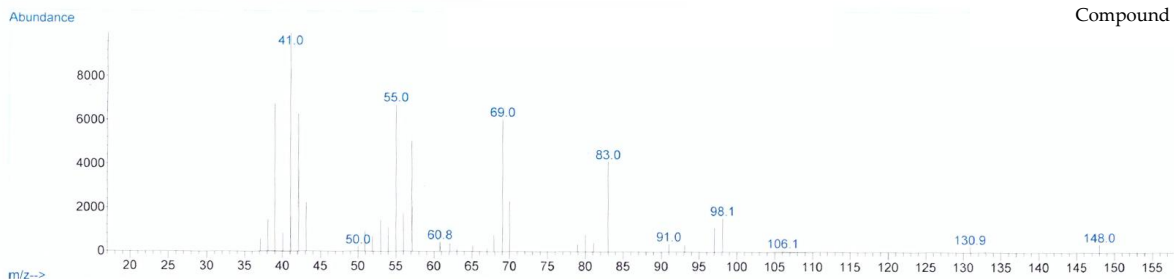

Compound 1

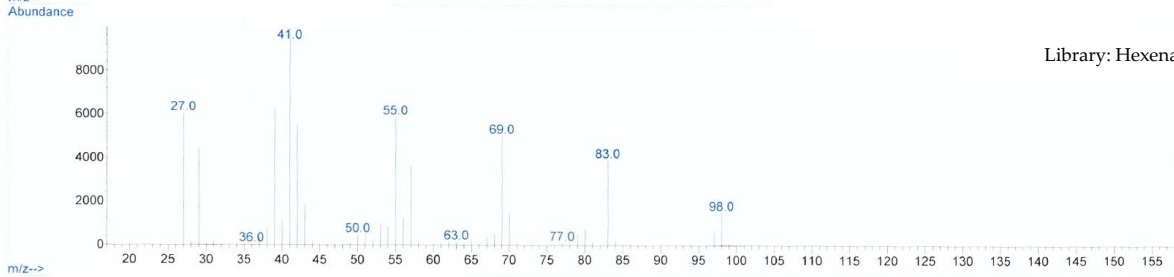

Library: Hexenal

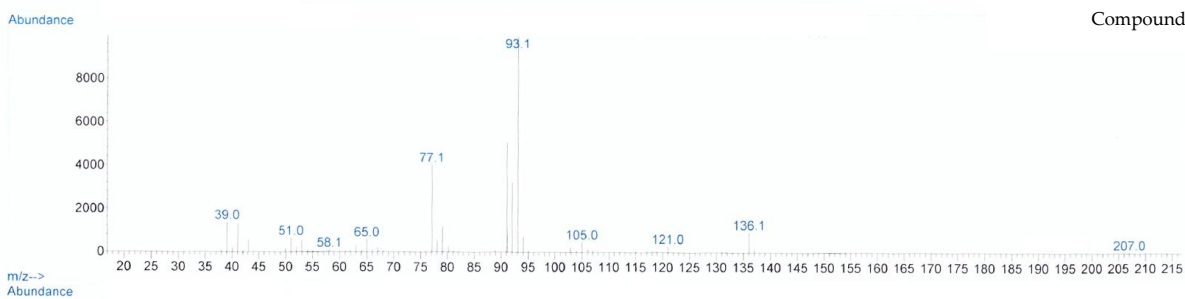

Compound 2

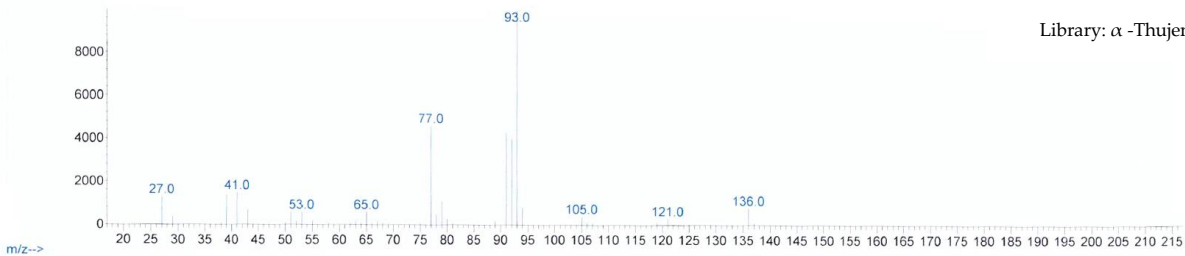

Library:  $\alpha$ -Thujene

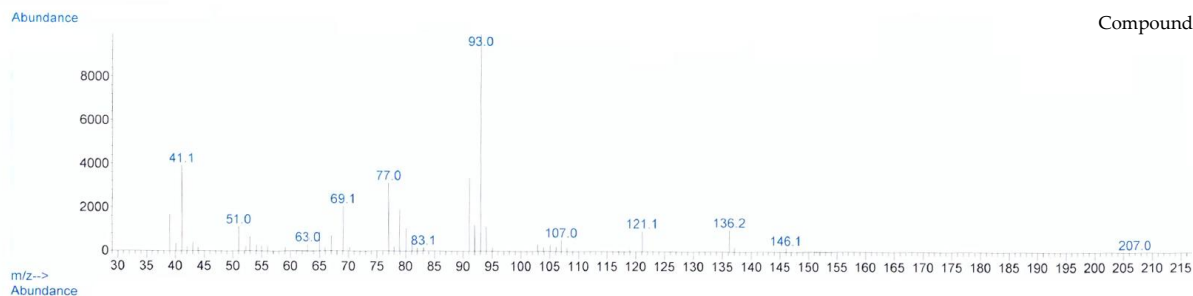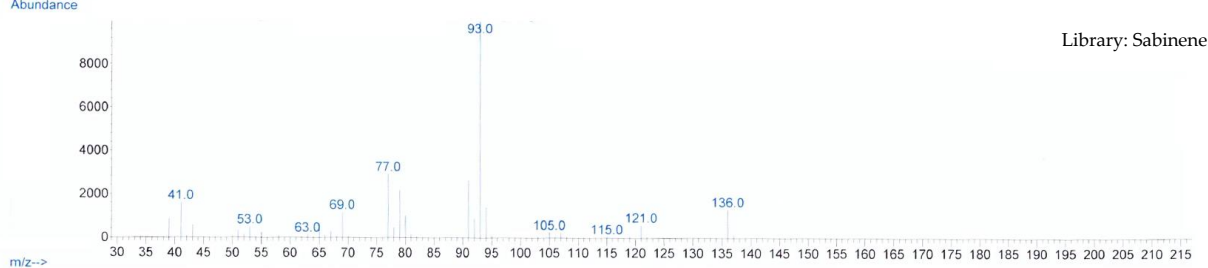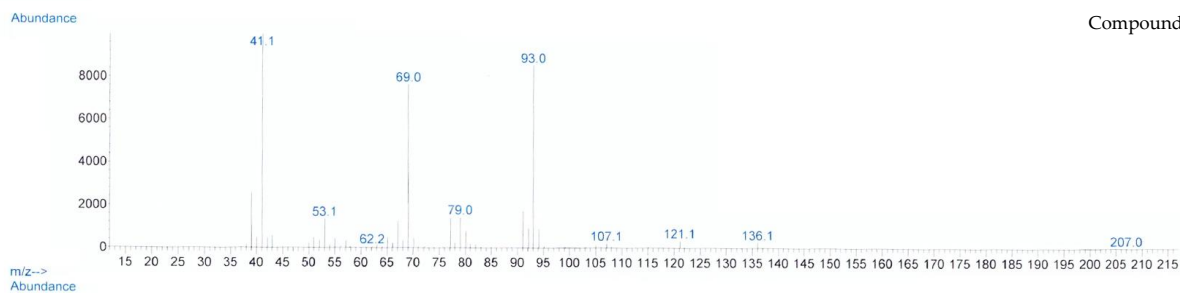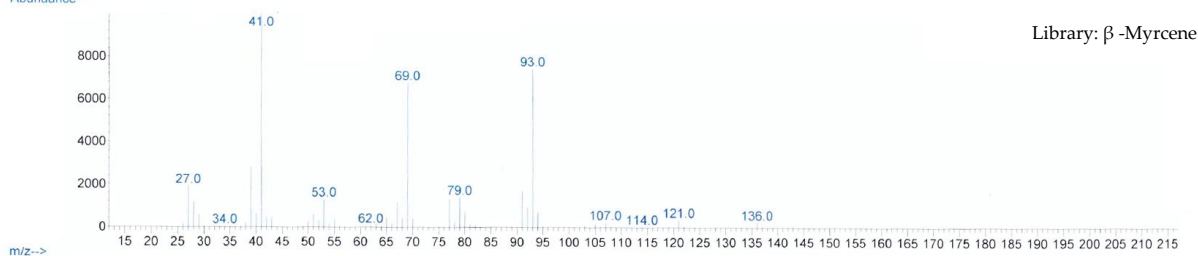

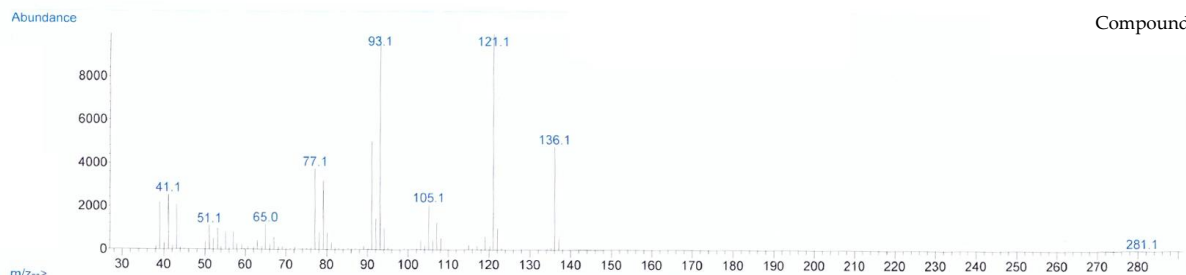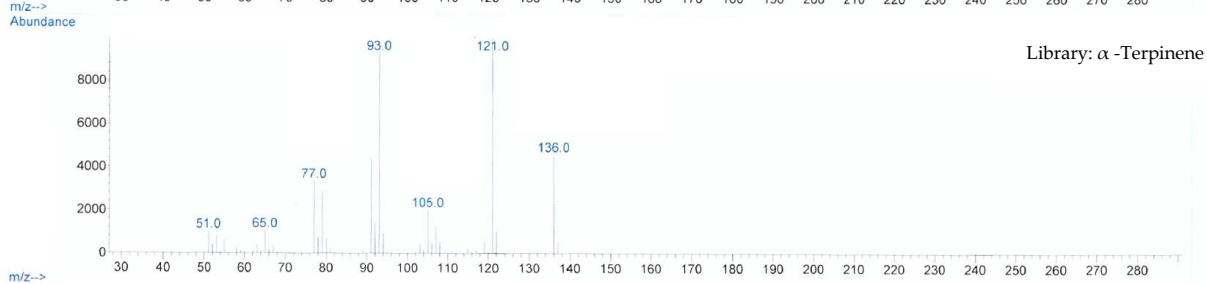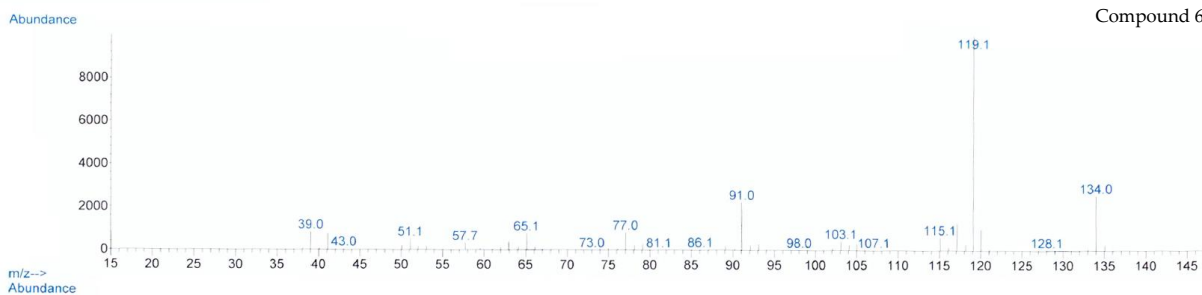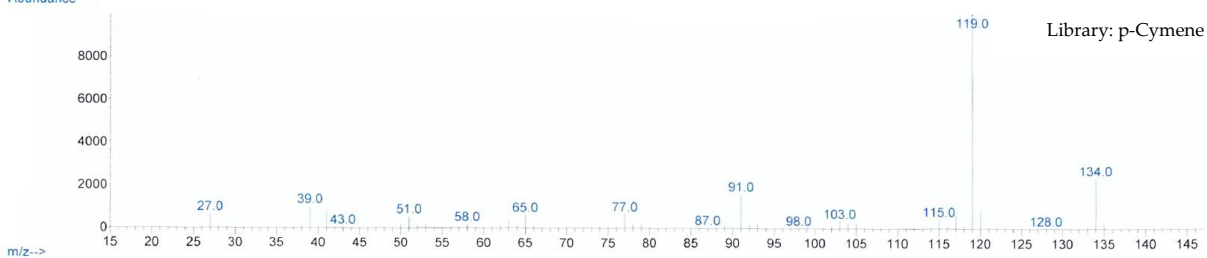

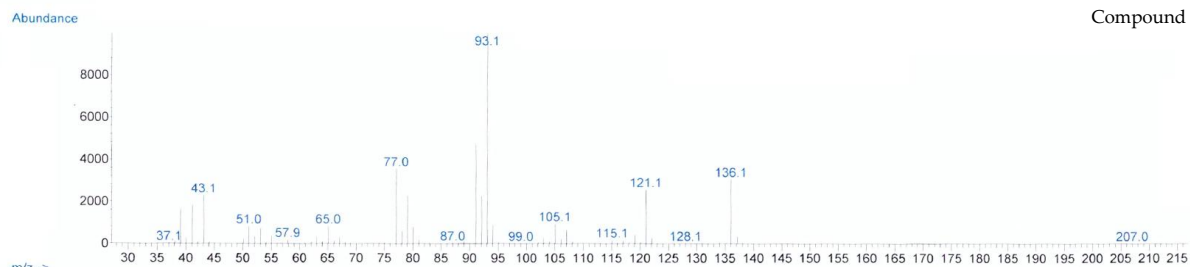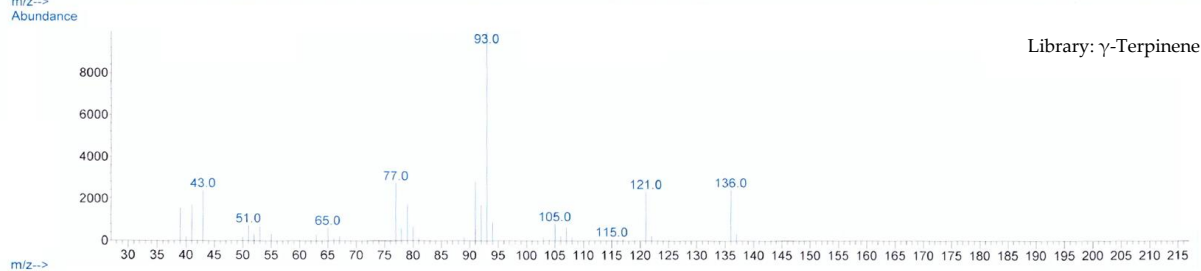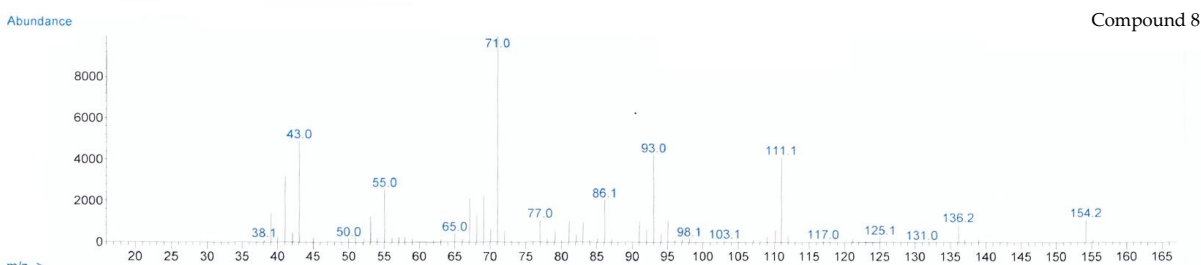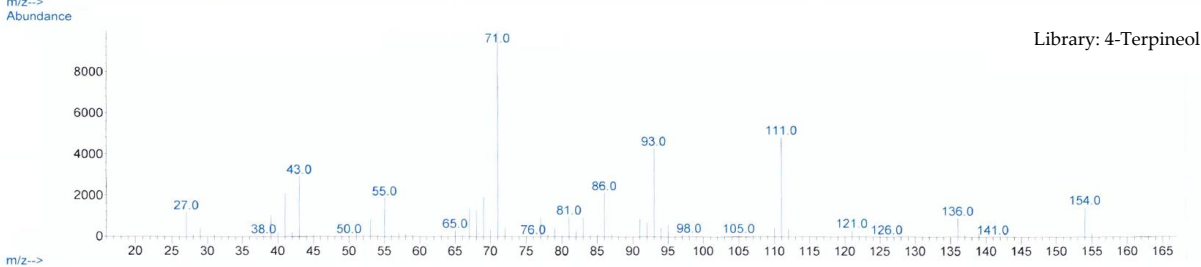

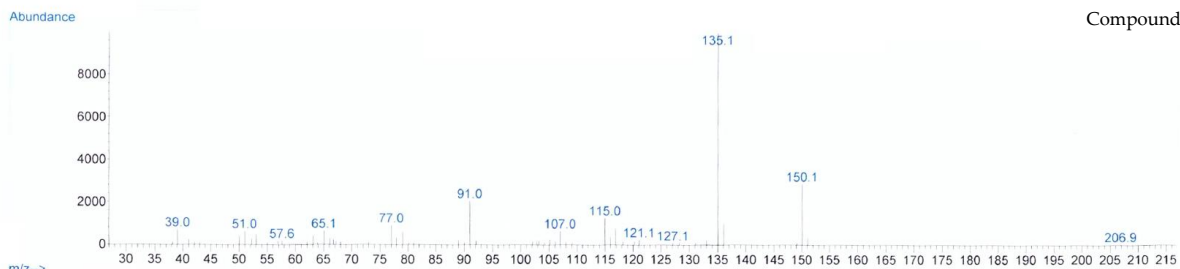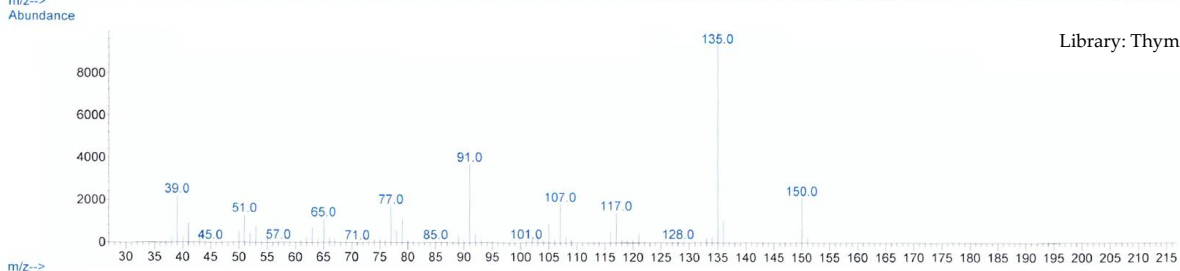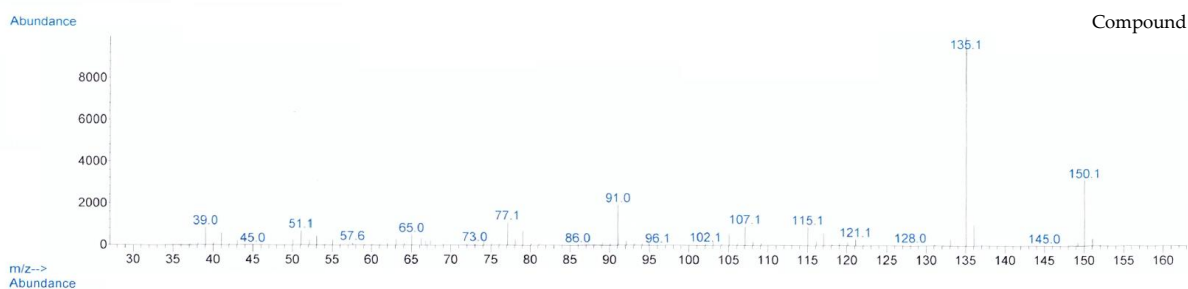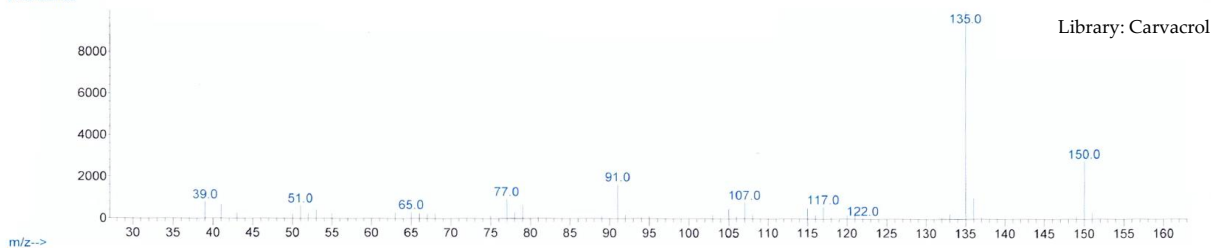

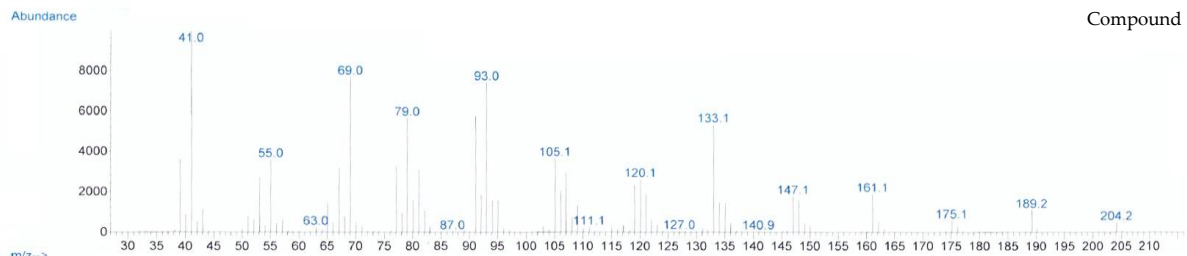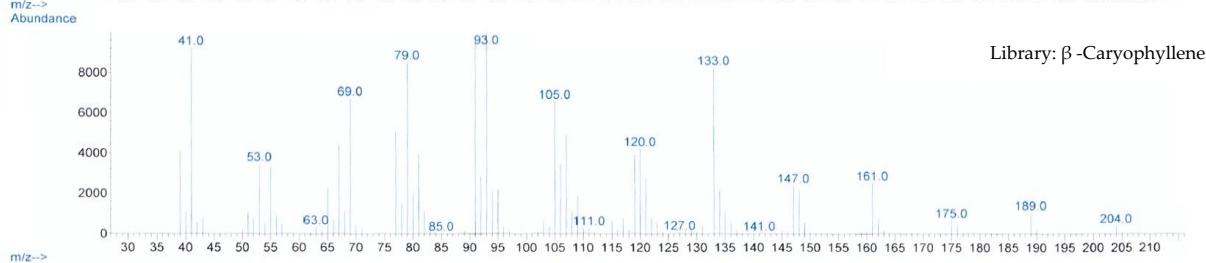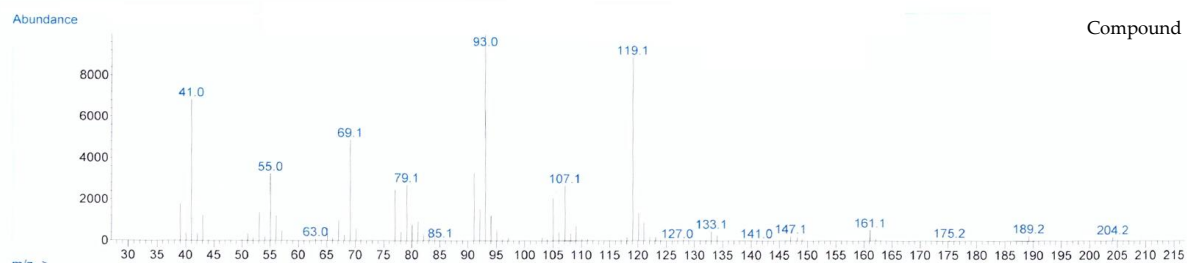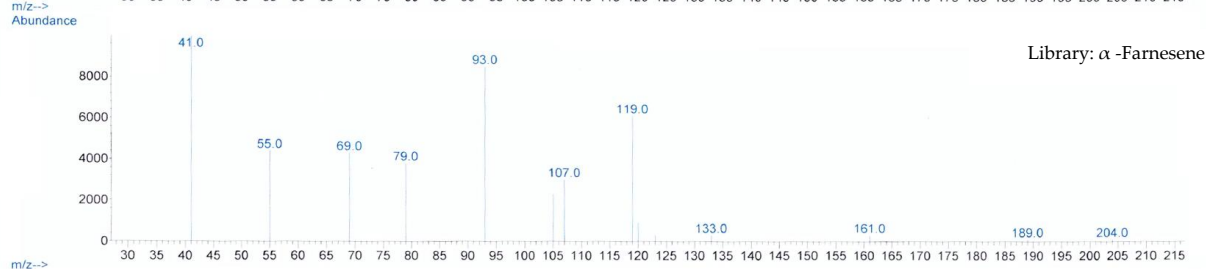

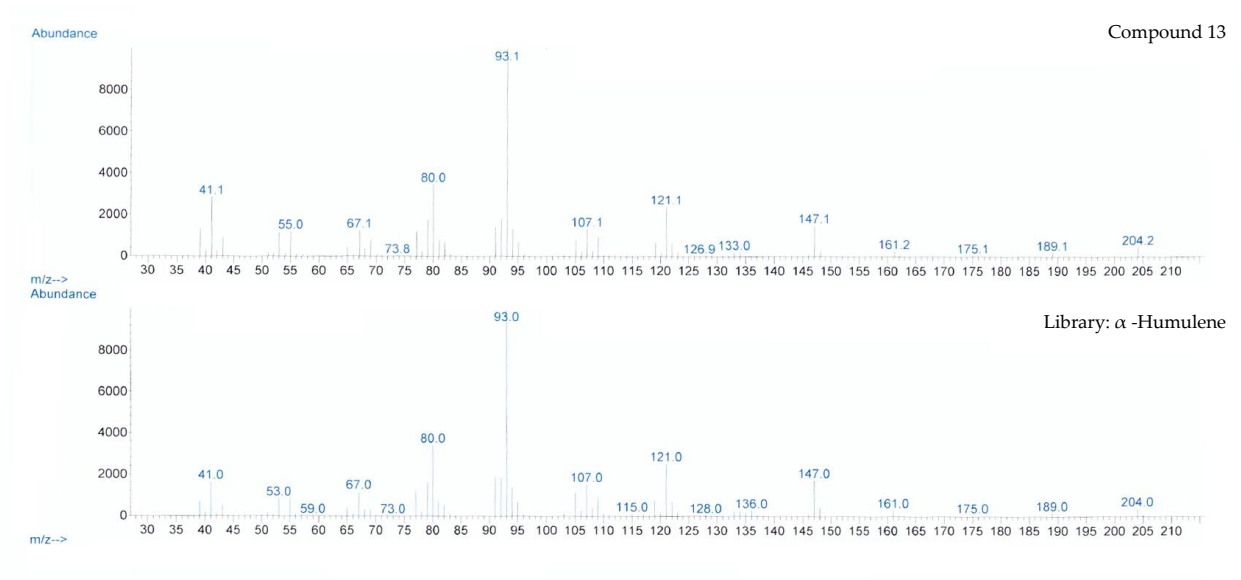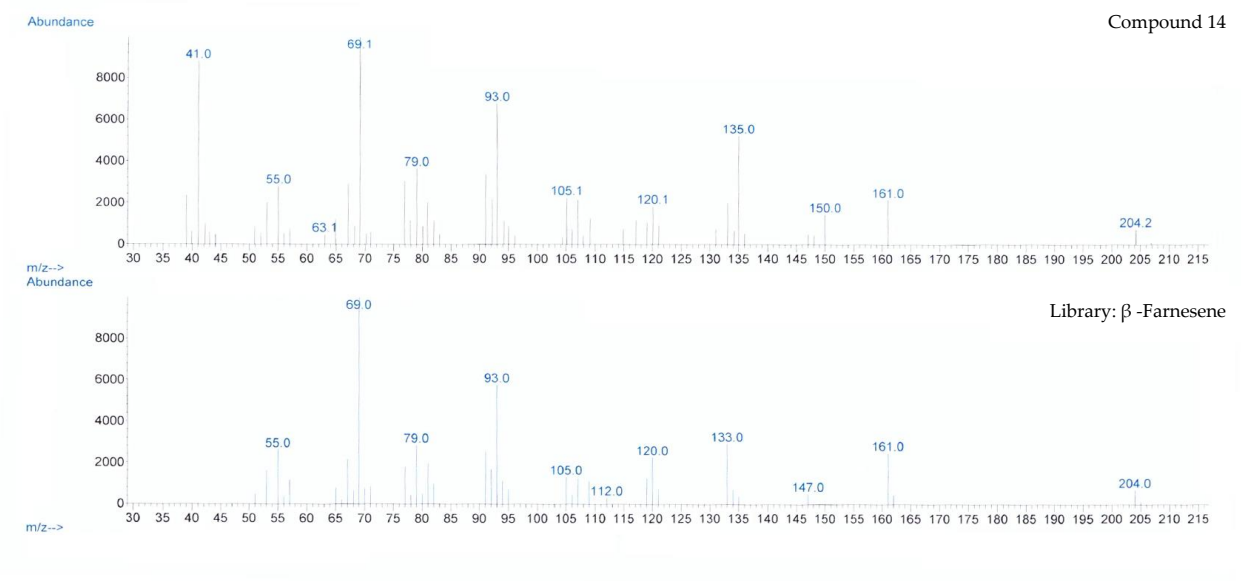

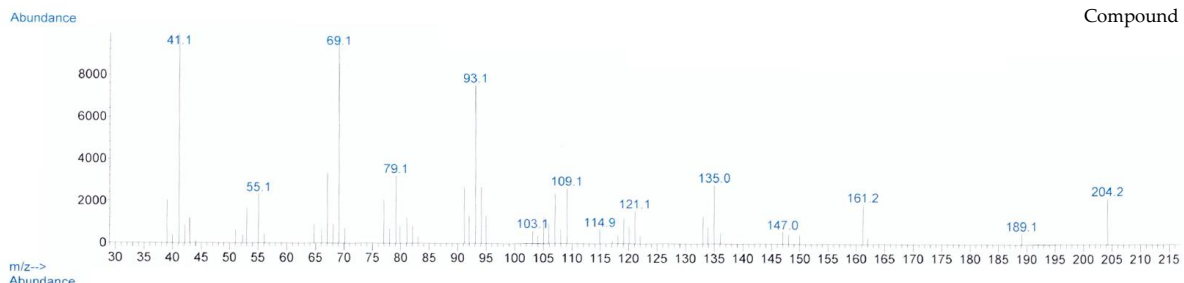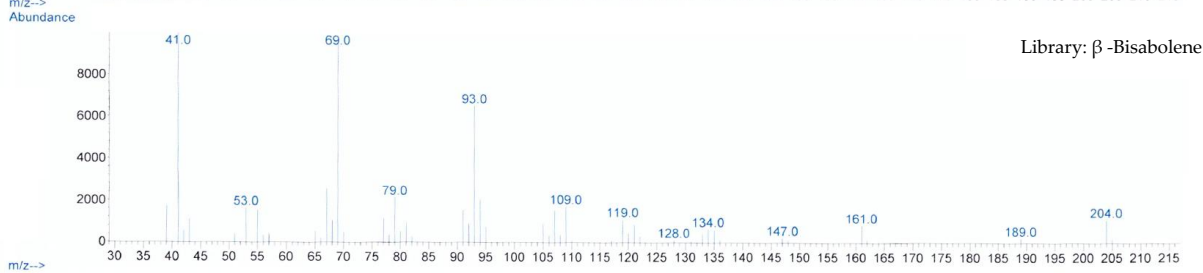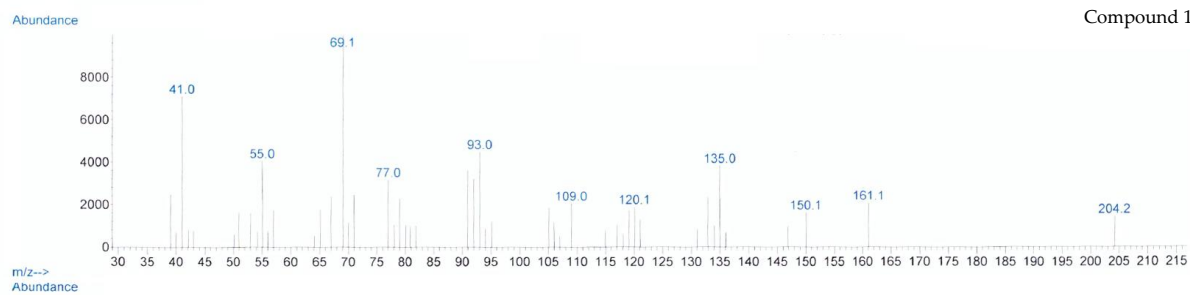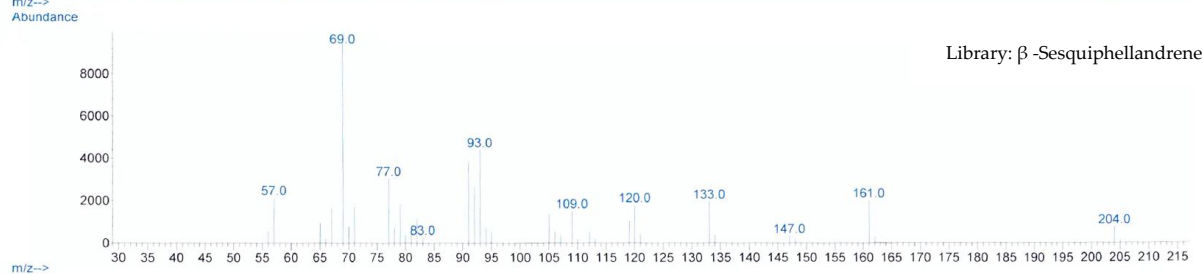

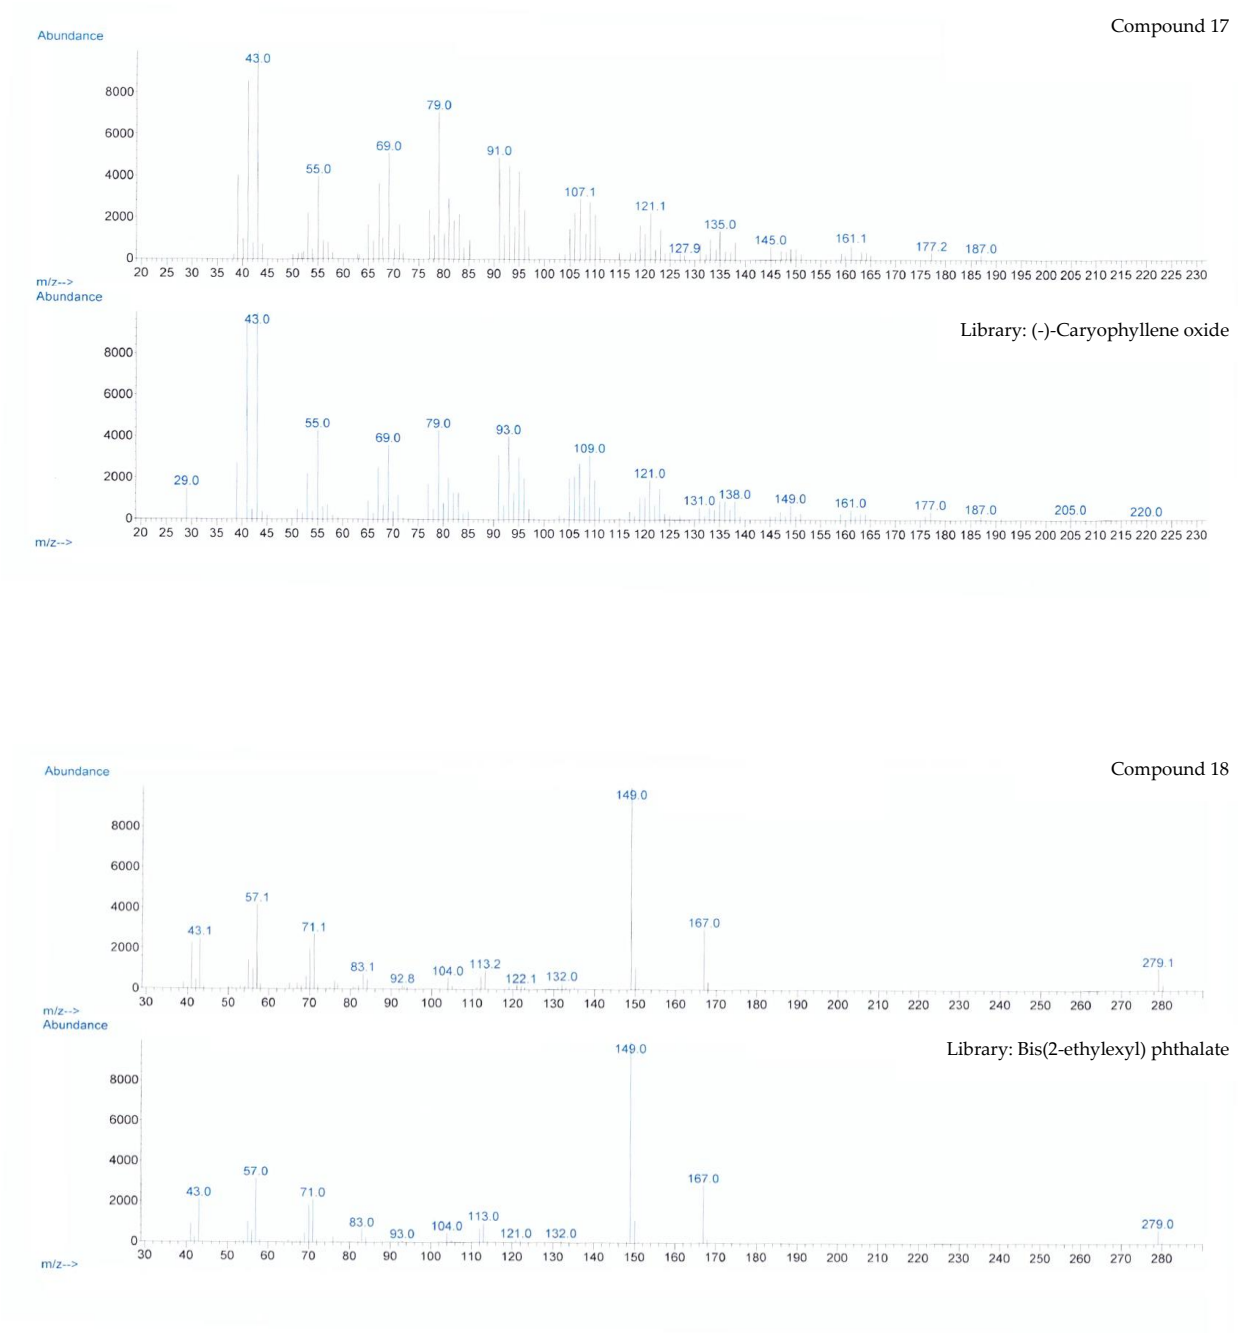

**Figure S1:** Mass spectrum of the main components of *Coleus amboinicus* essential oil determined via gas chromatography–mass spectrometry
